# Supplementary material for: A framework to identify contributing genes in patients with Phelan-McDermid syndrome
Source: PubMed Central journal article supplement (PMC5677962; doi:10.1038/s41525-017-0035-2), 2017-10-23

## ASD

OR=0.52 (0.12–2.1)   OR=1.1 (0.17–6.7)   OR=3.4 (0.25–192)   OR=Inf (0.2–Inf)

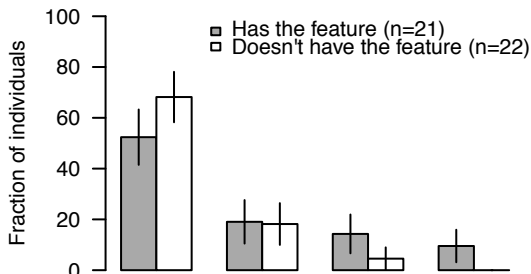

## Absence of language

OR=2.9 (0.8–12)   OR=1.5 (0.35–6.4)   OR=2.5 (0.33–30)   OR=2.4 (0.12–149)

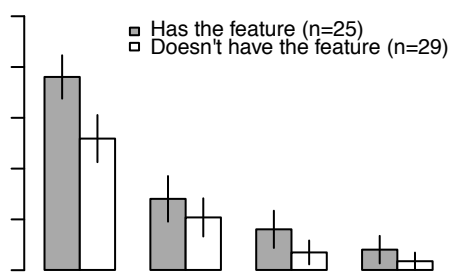

## Seizures

OR=1.7 (0.39–9.1)   OR=0.41 (0.038–2.4)   OR=0.8 (0.014–11)   OR=1.2 (0.019–25)

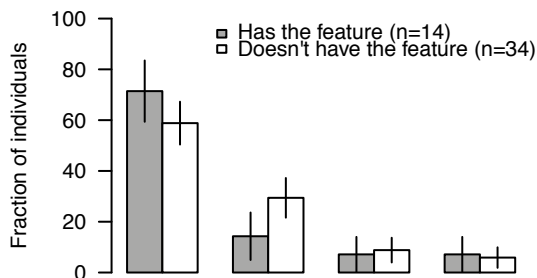

## Heart abnormalities

OR=2.9 (0.29–147)   OR=1.3 (0.1–10)   OR=5 (0.35–52)   OR=0 (0–43)

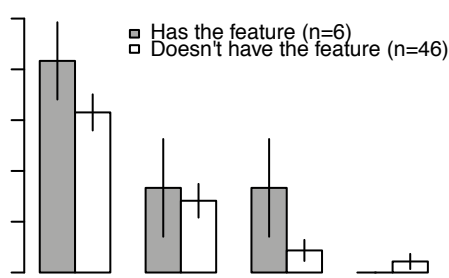

## Ophthalmic features

OR=0.84 (0.21–3.5)   OR=0.47 (0.072–2.2)   OR=0.42 (0.01–4.3)   OR=0 (0–12)

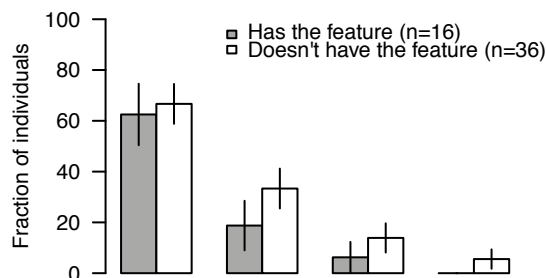

## Gastroesophageal reflux

OR=0.75 (0.15–4.3)   OR=1.1 (0.15–5.7)   OR=0 (0–3.6)   OR=0 (0–23)

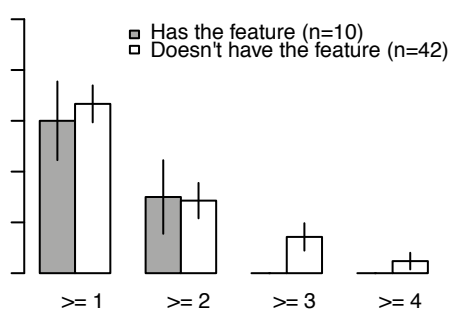

## CC abnormalities

OR=3.7 (0.53–45)   OR=0.72 (0.057–5.6)   OR=2.6 (0.16–43)   OR=2.4 (0.028–205)

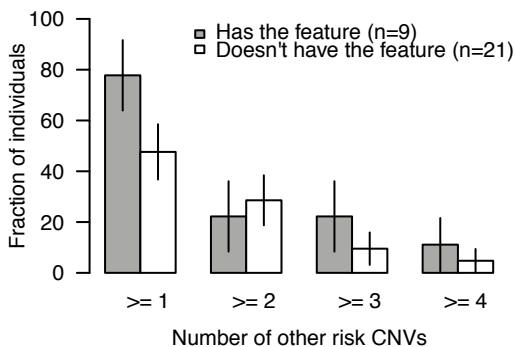

Supplement: 41525_2017_35_MOESM7_ESM.pdf [file 41525_2017_35_MOESM7_ESM.pdf]
