# Supplementary material for: A framework to identify contributing genes in patients with Phelan-McDermid syndrome
Source: PubMed Central journal article supplement (PMC5677962; doi:10.1038/s41525-017-0035-2), 2017-10-23

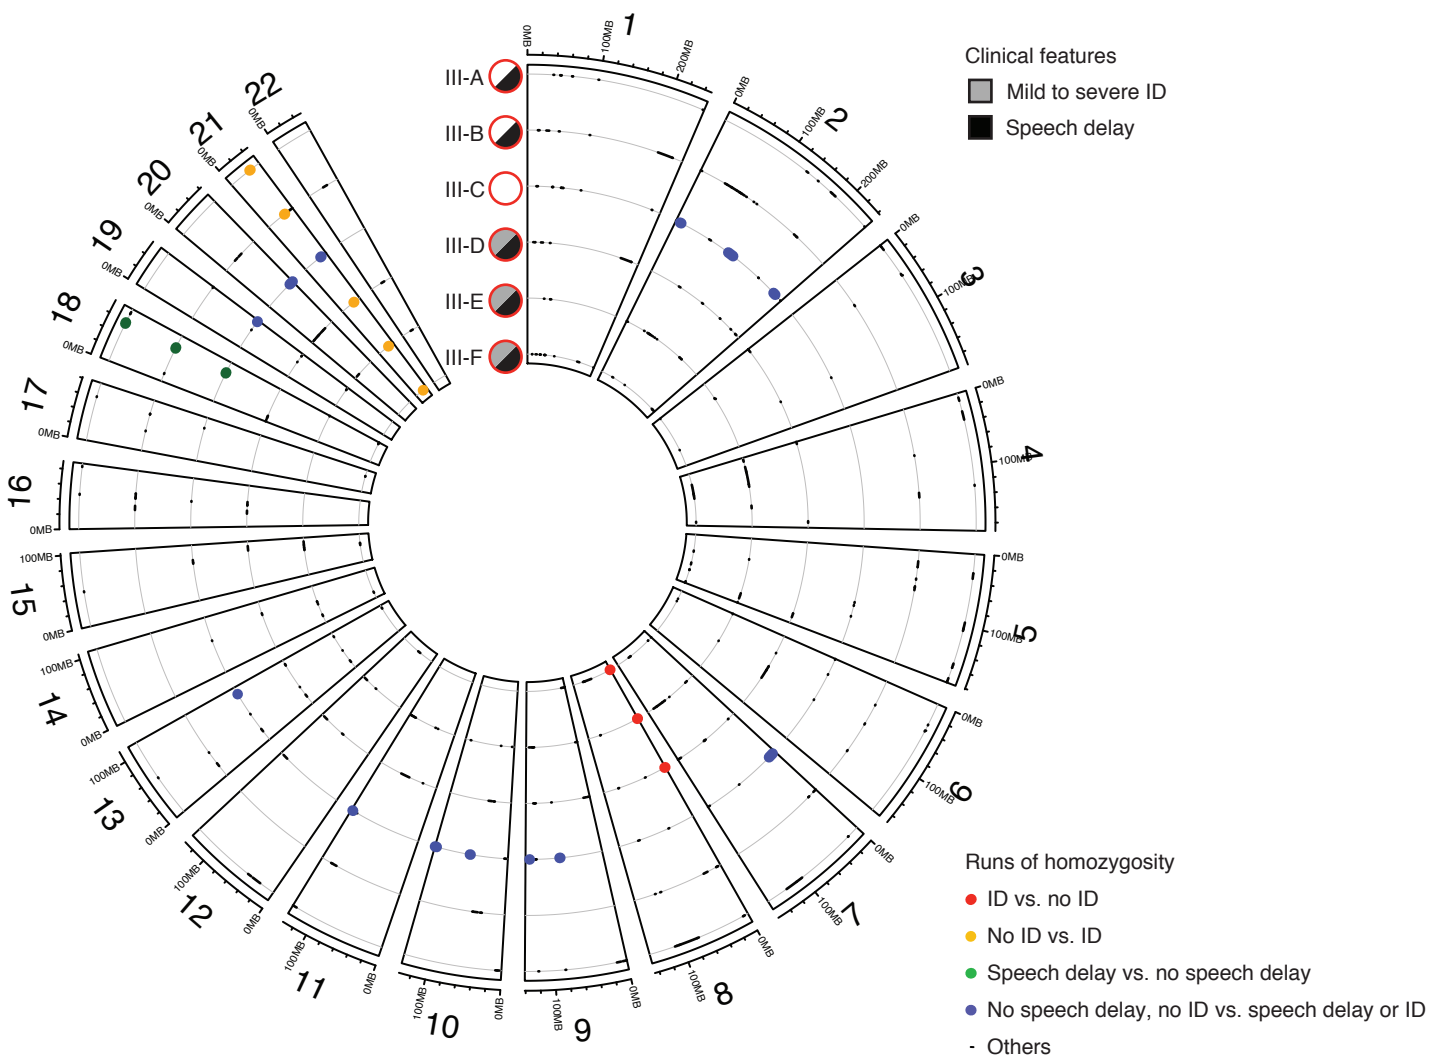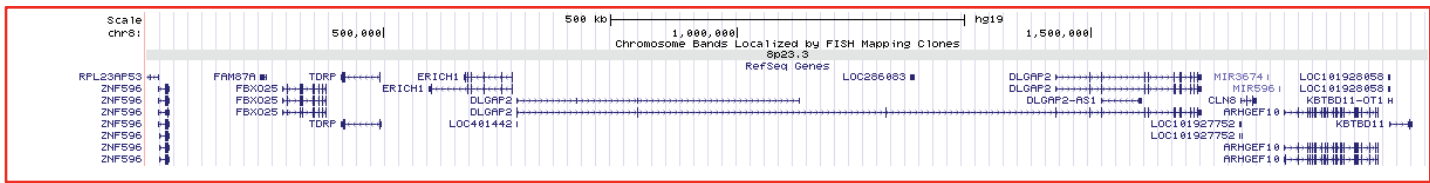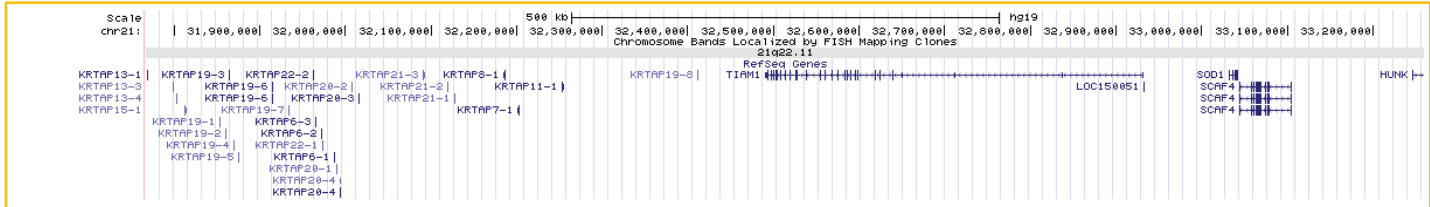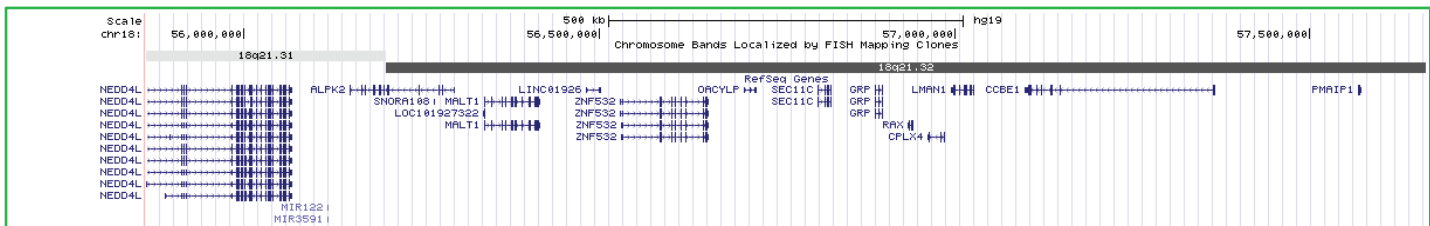

Supplement: 41525_2017_35_MOESM8_ESM.pdf [file 41525_2017_35_MOESM8_ESM.pdf]
