# Supplementary material for: A framework to identify contributing genes in patients with Phelan-McDermid syndrome
Source: PubMed Central journal article supplement (PMC5677962; doi:10.1038/s41525-017-0035-2), 2017-10-23

# Hapmap3

## Africa

- ASW
- LWK
- MKK
- YRI

## Europe

- CEU
- TSI

## Asia

- CHB
- CHD
- JPT

- GIH
- MEX

- This work

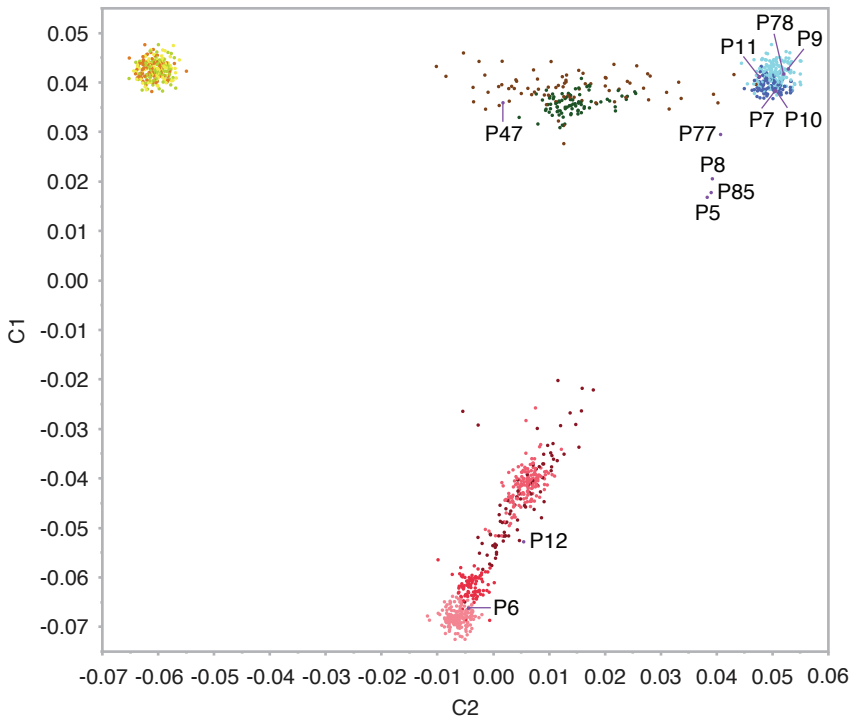

Supplement: 41525_2017_35_MOESM12_ESM.pdf [file 41525_2017_35_MOESM12_ESM.pdf]
